# Supplementary material
Source: publisher site journal article supplement (https://www.spandidos-publications.com/54/downloadSupplementary)
Supplement: Supplementary file 1 [file downloadSupplementary]

Figure S1. The long-term prognosis of patients after surgery without hepatectomy for extra-cholangiocarcinoma (eCCA). (A) The overall survival (OS, upper left), disease-free survival (DFS, upper right) and survival after recurrence (SAR, lower left) curves after surgery for 28 patients with eCCA. Patients were divided into two groups according to the median postoperative peak number of neutrophils. The median OS in the high-neutrophil group (n=8) and low-neutrophil group (n=20) was 51.7 and 37.2 months, respectively;  $P=0.6514$ . The median DFS in the high-neutrophil group and low-neutrophil group was 34.3 and 33.7 months, respectively;  $P=0.6630$ . The median SAR in the high-neutrophil group and low-neutrophil group was 5.2 and 11.5 months, respectively;  $P=0.6817$ . (B) The OS (upper left), DFS (upper right) and SAR (lower left) curves after surgery for 28 patients with eCCA. Patients were divided into two groups according to the median postoperative peak number of eosinophils. The median OS in the high-eosinophil group (n=15) and low-eosinophil group (n=13) was 37.5 and 36.8 months, respectively;  $P=0.5980$ . The median DFS in the high-eosinophil group and low-eosinophil group was 33.7 and 42.0 months, respectively;  $P=0.5254$ . The median SAR in the high-eosinophil group and low-eosinophil group was 12.7 and 5.7 months, respectively;  $P=0.6372$ .

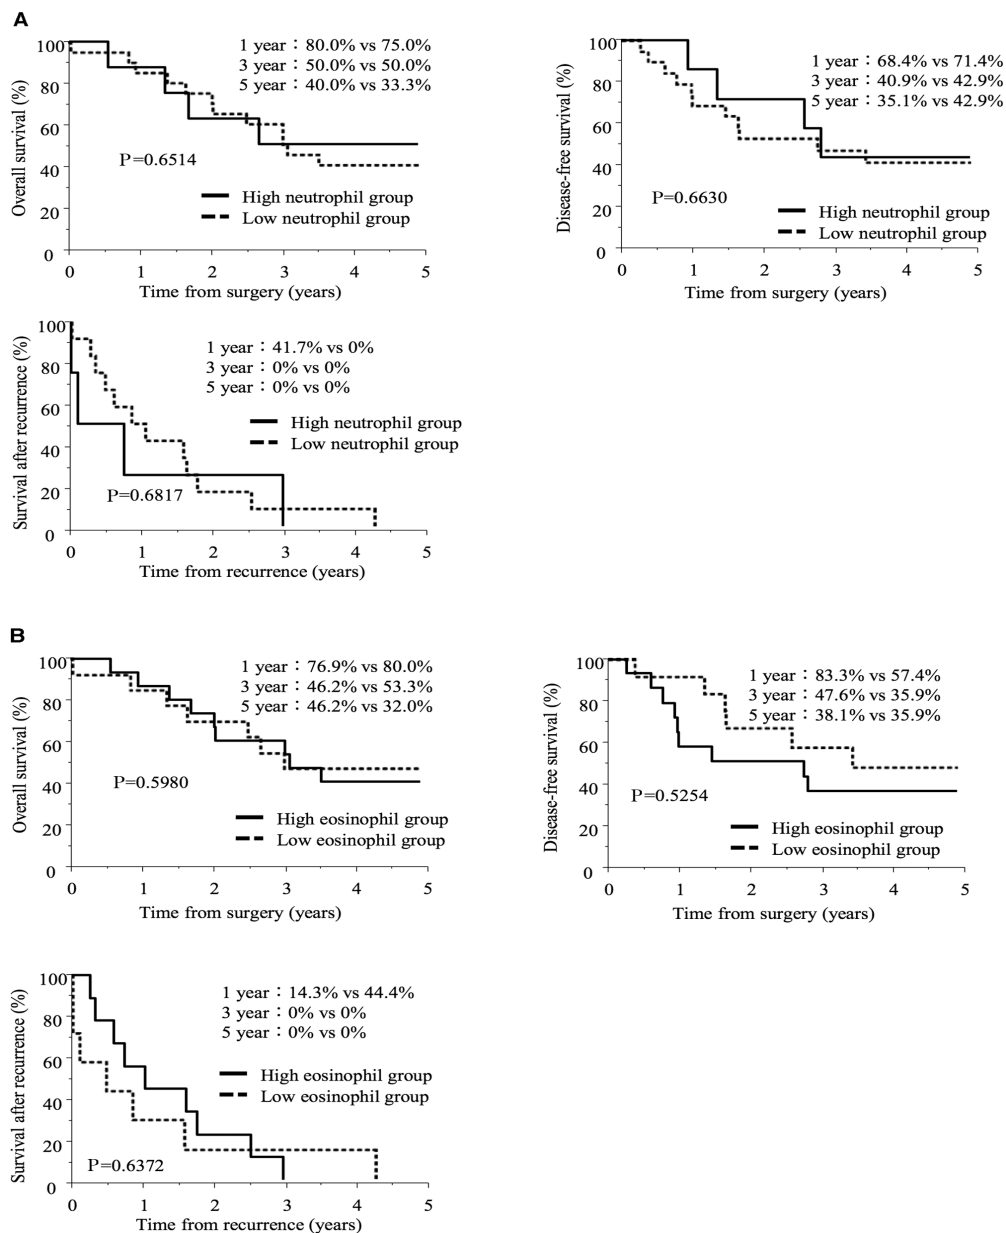

Figure S2. The long-term prognosis of patients after hepatectomy for intra-hepatic cholangiocarcinoma (iCCA) and extra-hepatic cholangiocarcinoma (eCCA). (A) The overall survival (OS, upper left), disease-free survival (DFS, upper right) and survival after recurrence (SAR, lower left) curves after surgery for 57 patients with iCCA. Patients were divided into two groups according to the median postoperative peak number of neutrophils. The median OS in the high-neutrophil group (n=22) and low-neutrophil group (n=35) was 39.4 and 74.8 months, respectively;  $P=0.1124$ . The median DFS in the high-neutrophil group and low-neutrophil group was 10.3 and 25.1 months, respectively;  $P=0.5030$ . The median SAR in the high-neutrophil group and low-neutrophil group was 15.4 and 22.8 months, respectively;  $P=0.1629$ . (B) The OS (upper left), DFS (upper right) and SAR (lower left) curves after surgery for 24 patients with eCCA. Patients were divided into two groups according to the median postoperative peak number of neutrophils. The median OS in the high-neutrophil group (n=18) and low-neutrophil group (n=6) was 43.7 and 39.5 months, respectively;  $P=0.6741$ . The median DFS in the high-neutrophil group and low-neutrophil group was 19.2 and 30.6 months, respectively;  $P=0.7019$ . The median SAR in the high-neutrophil group and low-neutrophil group was 10.9 and 18.1 months, respectively;  $P=0.3590$ .

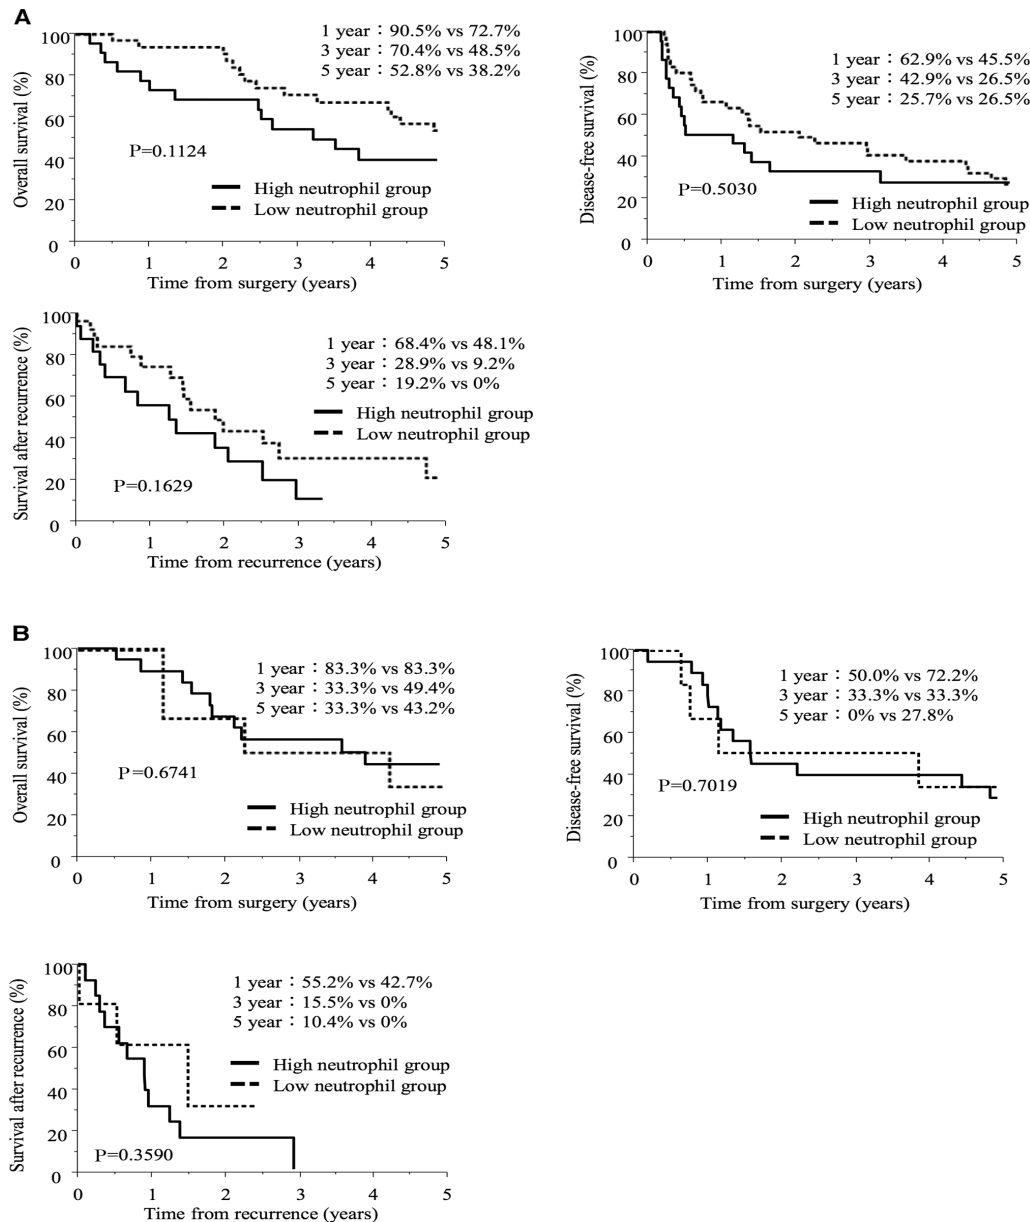

| <b>Table SI.</b> Results of univariate analyses for the SAR       |                 |                     |
|-------------------------------------------------------------------|-----------------|---------------------|
| Variable                                                          | MST<br>(months) | Univariate analysis |
|                                                                   |                 | <i>P</i> -value     |
| <b>Patient factors</b>                                            |                 |                     |
| Age (<65: ≥65 years)                                              | 11.6: 17.6      | 0.4130              |
| Gender (male: female)                                             | 15.4: 17.7      | 0.5695              |
| Jaundice (present: absent)                                        | 15.0: 17.6      | 0.5349              |
| PNI (≤45: >45)                                                    | 17.6: 15.6      | 0.5095              |
| NLR (≤2.5: >2.5)                                                  | 17.7: 15.0      | 0.0694              |
| PLR (≤150: >150)                                                  | 30.9: 11.0      | 0.0137              |
| Postoperative maximum number of leukocytes<br>(≤11580: >11580/μl) | 24.2: 11.0      | 0.0076              |
| Postoperative peak value of CRP<br>(≤9.7: >9.7 mg/dl)             | 17.7: 15.4      | 0.2986              |
| <b>Tumor factors</b>                                              |                 |                     |
| Tumor type (intrahepatic CCA: perihilar CCA)                      | 18.8: 10.9      | 0.0564              |
| Differentiation (tub1, tub2: others)                              | 15.6: 16.5      | 0.5418              |
| pT*(1, 2: 3, 4)                                                   | 24.2: 11.0      | 0.0765              |
| Historical vascular invasion (present: absent)                    | 11.0: 18.1      | 0.0352              |
| Tumor size (≤2: >2 cm)                                            | 15.0: 16.8      | 0.7368              |
| pN*(0: 1)                                                         | 18.1: 8         | 0.0424              |
| pM*(1: 0)                                                         | 4.3: 16.8       | 0.1233              |
| pStage*(I, II: III, IV)                                           | 30.9: 10.5      | 0.1010              |
| CEA (≤5: >5 ng/ml)                                                | 16.5: 12.4      | 0.9242              |
| CA19-9 (≤37: >37 U/ml)                                            | 17.7: 11.6      | 0.1376              |
| <b>Treatment factors</b>                                          |                 |                     |
| Adjuvant therapy (yes: no)                                        | 17.7: 11.0      | 0.0702              |
| Treatment after recurrence with gemcitabine<br>(yes: no)          | 22.8: 11.6      | 0.0559              |
| Operative method of hepatectomy (major: minor)                    | 15.4: 18.8      | 0.3948              |
| Operation time (≤545: >545 min)                                   | 30.9: 8.9       | 0.0005              |
| Blood loss (<1000: ≥1000 ml)                                      | 22.8: 11.0      | 0.1556              |
| Morbidity (present: absent)                                       | 6.5: 17.7       | 0.0176              |
| Resected liver weight (≤340: >340 g)                              | 24.2: 11.0      | 0.0673              |

SAR, survival after recurrence; CCA, cholangiocarcinoma; tub1, well differentiated type; tub2, moderately differentiated type; PNI, prognostic nutritional index; NLR, Neutrophil-to-lymphocyte ratio; PLR, platelet-to-lymphocyte ratio; CRP, C-reactive protein, major hepatectomy: >3 segments, minor hepatectomy:  $\leq 3$  segments. *P*-value <0.05 was considered statistically significant. \*Stage and TNM for iCCAs and pCCAs were classified by the 6<sup>th</sup> edition of the general rules for the clinical and pathological study of primary liver cancer and the 6<sup>th</sup> edition of general rules for clinical and pathological studies on cancer of the biliary tract, respectively.

| <b>Table SII.</b> Results of a multivariate analysis for the SAR in leukocytes.                                        |                       |             |                 |
|------------------------------------------------------------------------------------------------------------------------|-----------------------|-------------|-----------------|
| Variable                                                                                                               | Multivariate analysis |             |                 |
|                                                                                                                        | HR                    | (95% CI)    | <i>P</i> -value |
| The postoperative maximum number of leukocytes ( $\leq 11580$ : $>11580/\mu\text{l}$ )                                 |                       |             | N.A.            |
| The postoperative maximum number of neutrophils ( $\leq 9807$ : $>9807/\mu\text{l}$ )                                  | 0.38                  | (0.19-0.73) | 0.0039          |
| The postoperative maximum number of lymphocytes ( $\leq 1513$ : $>1513/\mu\text{l}$ )                                  | 1.03                  | (0.53-2.00) | 0.9193          |
| The postoperative maximum number of eosinophils ( $\leq 356$ : $>356/\mu\text{l}$ )                                    | 3.40                  | (1.66-7.19) | 0.0008          |
| The postoperative maximum number of monocytes ( $\leq 815$ : $>815/\mu\text{l}$ )                                      | 0.70                  | (0.37-1.33) | 0.2736          |
| The postoperative maximum number of basophils ( $\leq 58$ : $>58/\mu\text{l}$ )                                        | 0.89                  | (0.45-1.72) | 0.7202          |
| SAR, survival after recurrence; N.A., not available. <i>P</i> -value $<0.05$ was considered statistically significant. |                       |             |                 |
